# Supplementary material for: Real-World Estimation of First- and Second-Line Treatments for Diffuse Large B-Cell Lymphoma Using Health Insurance Data: A Belgian Population-Based Study
Source: PubMed Central journal article supplement (PMC8922541; doi:10.3389/fonc.2022.824704), 2022-02-28
Supplement: DataSheet_1.pdf [file DataSheet_1.pdf]

## *Supplementary Material*

### **1 Supplementary figures**

|                                                                                                                                     |   |
|-------------------------------------------------------------------------------------------------------------------------------------|---|
| Supplementary Figure 1: Absolute number of registered other malignancies, grouped by time of diagnosis from incidence of DLBCL..... | 2 |
| Supplementary Figure 2 : Observed survival by age.....                                                                              | 3 |

### **2 Supplementary tables**

|                                                                                                                                                                                                 |    |
|-------------------------------------------------------------------------------------------------------------------------------------------------------------------------------------------------|----|
| Supplementary Table 1: Patient characteristics and prognostic markers by age group. ....                                                                                                        | 3  |
| Supplementary Table 2: The 2- and 5-year relative survival after incidence by patient- and treatment characteristics. ....                                                                      | 6  |
| Supplementary Table 3: Distribution of administered first-line regimens, with or without the use of rituximab.....                                                                              | 9  |
| Supplementary Table 4: Patient characteristics of the incomplete R-CHOP subgroups compared to full R-CHOP.....                                                                                  | 10 |
| Supplementary Table 5: Patient characteristics grouped by first-line treatments. ....                                                                                                           | 13 |
| Supplementary Table 6: Patient characteristics according to CNS Prophylaxis in R-CHOP(-like) treated patients, divided by mode of administration.....                                           | 16 |
| Supplementary Table 7: All second-line treatments by age group.....                                                                                                                             | 17 |
| Supplementary Table 8: Univariable analysis based on Cox models including all evaluated variables in all patients receiving any first line treatment. ....                                      | 18 |
| Supplementary Table 9: Adjusted hazard ratios (HR) from a multivariable analysis based on Cox models including all evaluated variables in all patients receiving any first line treatment. .... | 21 |

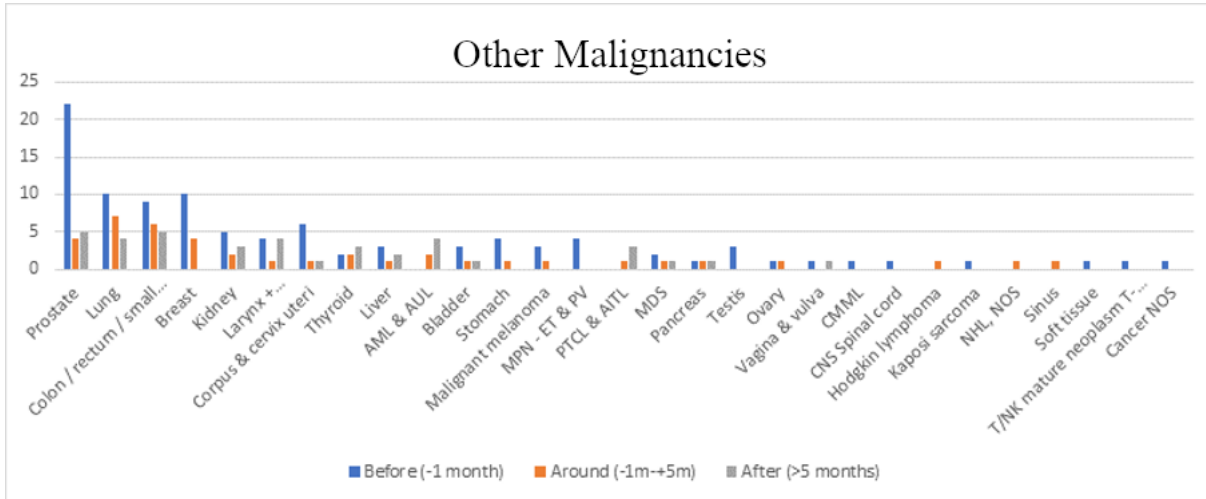

**Supplementary Figure 1: Absolute number of registered other malignancies, grouped by time of diagnosis from incidence of DLBCL.** Only those registered at the BCR are shown in this graph, thus excluding presumed malignancies based only on non-lymphoma treatments.

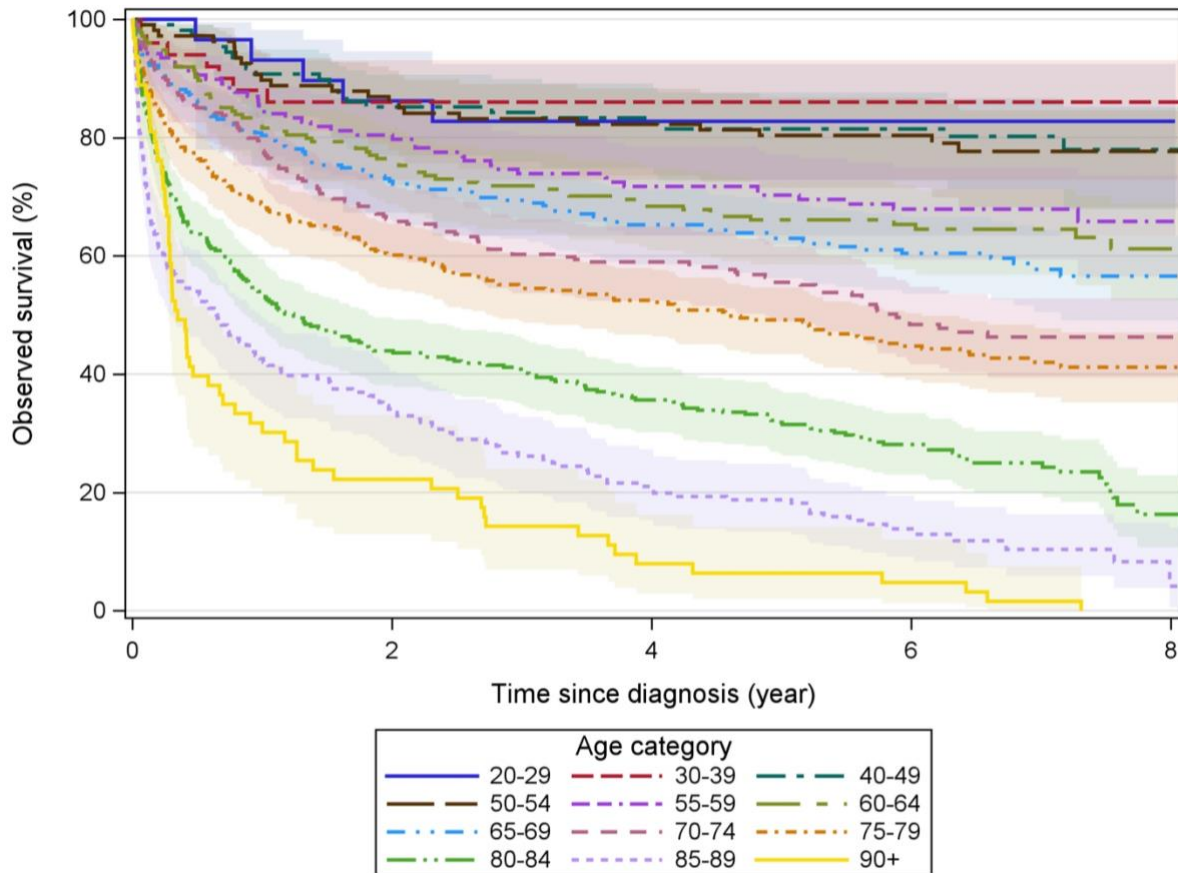

**Supplementary Figure 2 : Observed survival by age.** These Kaplan-Meier curves show the observed survival from time of diagnosis of all 1888 patients grouped into 12 age categories. Observed survival in the age categories below 55yr cluster together. From >55yr onward, observed survival worsens with advancing age and seems to change more markedly at the 55yr, 70yr and 80yr-mark compared to 60yr, which is the age-cutoff in the IPI risk score. Colored areas represent the 95% confidence intervals.

**Supplementary Table 1: Patient characteristics and prognostic markers by age group.** *PS=Performance status; GCB=Germinal Center B-cell; IHC=immunohistochemistry*

|                            | 20-59yr  | 60-69yr  | 70-79yr   | 80-84yr  | 85+yr    | Overall    |
|----------------------------|----------|----------|-----------|----------|----------|------------|
| Overall                    | 432      | 393      | 535       | 289      | 239      | 1,888      |
| Gender                     |          |          |           |          |          |            |
| Male                       | 253 (59) | 240 (61) | 289 (54)  | 152 (53) | 96 (40)  | 1,030 (55) |
| Female                     | 179 (41) | 153 (39) | 246 (46)  | 137 (47) | 143 (60) | 858 (46)   |
| PS                         |          |          |           |          |          |            |
| 0                          | 82 (19)  | 65 (17)  | 63 (12)   | 29 (10)  | 10 (4)   | 249 (13)   |
| 1                          | 253 (59) | 227 (58) | 310 (58)  | 147 (51) | 123 (51) | 1,060 (56) |
| 2                          | 31 (7)   | 32 (8)   | 54 (10)   | 39 (13)  | 20 (8)   | 176 (9)    |
| 3                          | 12 (3)   | 13 (3)   | 20 (4)    | 16 (6)   | 24 (10)  | 85 (5)     |
| 4                          | 7 (2)    | 6 (2)    | 10 (2)    | 5 (2)    | 7 (3)    | 35 (2)     |
| Not available              | 47 (11)  | 50 (13)  | 78 (15)   | 53 (18)  | 55 (23)  | 283 (15)   |
| Ann Arbor stage            |          |          |           |          |          |            |
| 1                          | 63 (15)  | 40 (10)  | 52 (9.72) | 30 (10)  | 31 (13)  | 216 (11)   |
| 2                          | 66 (15)  | 54 (14)  | 69 (13)   | 37 (13)  | 26 (11)  | 252 (13)   |
| 3                          | 40 (9)   | 59 (15)  | 70 (13)   | 30 (10)  | 21 (9)   | 220 (12)   |
| 4                          | 148 (34) | 130 (33) | 168 (31)  | 72 (25)  | 47 (20)  | 565 (30)   |
| Not available              | 115 (27) | 110 (28) | 176 (33)  | 120 (42) | 114 (48) | 635 (34)   |
| Cell of origin             |          |          |           |          |          |            |
| GCB                        | 152 (35) | 128 (33) | 163 (30)  | 88 (30)  | 74 (31)  | 605 (32)   |
| Not available              | 151 (35) | 139 (35) | 198 (37)  | 108 (37) | 100 (42) | 696 (37)   |
| non-GCB                    | 129 (30) | 126 (32) | 174 (33)  | 93 (32)  | 65 (27)  | 587 (31)   |
| Ki-67 expression on IHC    |          |          |           |          |          |            |
| <50%                       | 15 (3)   | 6 (2)    | 16 (3)    | 9 (3)    | 7 (3)    | 53 (3)     |
| ≥50%                       | 256 (59) | 228 (58) | 294 (55)  | 143 (49) | 123 (51) | 1,044 (55) |
| Not available              | 161 (37) | 159 (40) | 225 (42)  | 137 (47) | 109 (46) | 791 (42)   |
| BCL2 overexpression on IHC |          |          |           |          |          |            |
| No                         | 80 (19)  | 42 (11)  | 64 (12)   | 38 (13)  | 29 (12)  | 253 (13)   |
| Not available              | 150 (35) | 138 (35) | 206 (39)  | 118 (41) | 98 (41)  | 710 (38)   |

|                                         | 20-59yr  | 60-69yr  | 70-79yr  | 80-84yr  | 85+yr    | Overall    |
|-----------------------------------------|----------|----------|----------|----------|----------|------------|
| Yes                                     | 202 (47) | 213 (54) | 265 (50) | 133 (46) | 112 (47) | 925 (49)   |
| <b>First line treatment</b>             |          |          |          |          |          |            |
| Full R-CHOP                             | 210 (49) | 238 (61) | 261 (49) | 90 (31)  | 27 (11)  | 826 (44)   |
| Other anthracycline                     | 115 (27) | 45 (11)  | 68 (13)  | 30 (10)  | 13 (5)   | 271 (14)   |
| Non-anthracycline                       | 8 (2)    | 16 (4)   | 39 (7)   | 46 (16)  | 53 (22)  | 162 (9)    |
| No chemotherapy/radiotherapy            | 19 (4)   | 21 (5)   | 51 (10)  | 49 (17)  | 105 (44) | 245 (13)   |
| Incomplete R-CHOP                       | 78 (18)  | 70 (18)  | 110 (21) | 62 (21)  | 17 (7)   | 337 (18)   |
| Only radiotherapy                       | 2 (0)    | 3 (1)    | 6 (1)    | 12 (4)   | 24 (10)  | 47 (2)     |
| <b>Language of the pathology report</b> |          |          |          |          |          |            |
| French                                  | 180 (42) | 126 (32) | 183 (34) | 91 (31)  | 79 (33)  | 659 (35)   |
| Dutch                                   | 252 (58) | 267 (68) | 352 (66) | 198 (69) | 160 (67) | 1,229 (65) |
| <b>Respiratorical comorbidity</b>       |          |          |          |          |          |            |
| No                                      | 402 (93) | 356 (91) | 487 (91) | 265 (92) | 210 (88) | 1,720 (91) |
| Yes                                     | 30 (7)   | 37 (9)   | 48 (9)   | 24 (8)   | 29 (12)  | 168 (9)    |
| <b>Diabetical comorbidity</b>           |          |          |          |          |          |            |
| No                                      | 407 (94) | 331 (84) | 435 (81) | 233 (81) | 207 (87) | 1,613 (85) |
| Yes                                     | 25 (6)   | 62 (16)  | 100 (19) | 56 (19)  | 32 (13)  | 275 (15)   |
| <b>Cardiological comorbidity</b>        |          |          |          |          |          |            |
| No                                      | 336 (78) | 191 (49) | 165 (31) | 65 (22)  | 34 (14)  | 791 (42)   |
| Yes                                     | 96 (22)  | 202 (51) | 370 (69) | 224 (78) | 205 (86) | 1,097 (58) |
| <b>Prior malignancy</b>                 |          |          |          |          |          |            |
| No                                      | 425 (98) | 365 (93) | 488 (91) | 263 (91) | 229 (96) | 1,770 (94) |
| Yes                                     | 7 (2)    | 28 (7)   | 47 (9)   | 26 (9)   | 10 (4)   | 118 (6)    |
| <b>Subsequent malignancy</b>            |          |          |          |          |          |            |
| No                                      | 409 (95) | 367 (93) | 499 (93) | 274 (95) | 229 (96) | 1,778 (94) |
| Yes                                     | 23 (5)   | 26 (7)   | 36 (7)   | 15 (5)   | 10 (4)   | 110 (6)    |

**Supplementary Table 2: The 2- and 5-year relative survival after incidence by patient- and treatment characteristics.** Relative survival is calculated as the ratio of the observed survival in a group of patients to the expected survival in a comparable group of individuals from the general population matched on age, sex, region and calendar period. *PS=Performance status; GCB=Germinal Center B-cell; IHC=immunohistochemistry, CI=Confidence interval*

| Characteristic          | N    | 2-year relative survival after incidence |              | 5-year relative survival after incidence |              |
|-------------------------|------|------------------------------------------|--------------|------------------------------------------|--------------|
|                         |      | Estimate                                 | 95% CI       | Estimate                                 | 95% CI       |
| Overall                 | 1888 | 66.80                                    | [64.4, 69.1] | 62.62                                    | [59.9, 65.3] |
| Gender                  | .    | .                                        |              | .                                        |              |
| Male                    | 1030 | 66.67                                    | [63.3, 69.8] | 62.30                                    | [58.5, 66.0] |
| Female                  | 858  | 66.92                                    | [63.3, 70.3] | 62.98                                    | [58.9, 66.9] |
| PS                      | .    | .                                        |              | .                                        |              |
| 0                       | 249  | 84.55                                    | [78.8, 89.2] | 82.26                                    | [75.3, 88.2] |
| 1                       | 1060 | 74.63                                    | [71.5, 77.5] | 70.08                                    | [66.4, 73.6] |
| 2                       | 176  | 49.73                                    | [41.5, 57.6] | 41.21                                    | [32.9, 49.7] |
| 3                       | 85   | 26.65                                    | [17.5, 36.9] | 26.66                                    | [17.0, 37.7] |
| 4                       | 35   | 9.50                                     | [3.1, 20.5]  | 9.16                                     | [2.6, 21.6]  |
| Not available           | 283  | 47.67                                    | [41.1, 54.0] | 44.46                                    | [37.6, 51.3] |
| Ann Arbor stage         | .    | .                                        |              | .                                        |              |
| 1                       | 216  | 89.48                                    | [83.2, 94.3] | 88.00                                    | [79.9, 94.9] |
| 2                       | 252  | 80.97                                    | [74.7, 86.2] | 76.93                                    | [69.5, 83.6] |
| 3                       | 220  | 71.80                                    | [64.6, 78.1] | 67.50                                    | [59.3, 75.1] |
| 4                       | 565  | 60.62                                    | [56.1, 64.8] | 54.97                                    | [50.1, 59.7] |
| Not available           | 635  | 56.57                                    | [52.1, 60.8] | 52.90                                    | [48.1, 57.7] |
| Cell of origin          | .    | .                                        |              | .                                        |              |
| GCB                     | 605  | 72.77                                    | [68.6, 76.6] | 71.79                                    | [66.9, 76.4] |
| Not available           | 696  | 61.74                                    | [57.6, 65.6] | 57.33                                    | [52.8, 61.7] |
| non-GCB                 | 587  | 66.54                                    | [62.1, 70.7] | 59.35                                    | [54.3, 64.2] |
| Ki-67 expression on IHC | .    | .                                        |              | .                                        |              |
| <50%                    | 53   | 71.35                                    | [55.5, 83.4] | 71.02                                    | [53.4, 85.5] |
| ≥50%                    | 1044 | 68.93                                    | [65.7, 72.0] | 65.15                                    | [61.4, 68.7] |

| Characteristic                   | N    | 2-year relative survival after incidence |              | 5-year relative survival after incidence |              |
|----------------------------------|------|------------------------------------------|--------------|------------------------------------------|--------------|
|                                  |      | Estimate                                 | 95% CI       | Estimate                                 | 95% CI       |
| Not available                    | 791  | 63.63                                    | [59.8, 67.3] | 58.68                                    | [54.4, 62.9] |
| BCL2 IHC overexpression on IHC   | .    | .                                        | .            | .                                        | .            |
| No                               | 253  | 77.33                                    | [70.8, 82.9] | 75.20                                    | [67.8, 81.8] |
| Not available                    | 710  | 62.30                                    | [58.2, 66.2] | 57.78                                    | [53.3, 62.2] |
| Yes                              | 925  | 67.34                                    | [63.9, 70.6] | 62.87                                    | [58.9, 66.7] |
| Language of the pathology report | .    | .                                        | .            | .                                        | .            |
| French                           | 659  | 65.83                                    | [61.6, 69.8] | 61.53                                    | [56.8, 66.1] |
| Dutch                            | 1229 | 67.31                                    | [64.3, 70.2] | 63.20                                    | [59.8, 66.5] |
| Respiratorical comorbidity       | .    | .                                        | .            | .                                        | .            |
| No                               | 1720 | 68.10                                    | [65.6, 70.5] | 64.33                                    | [61.4, 67.1] |
| Yes                              | 168  | 53.17                                    | [44.6, 61.2] | 44.95                                    | [36.1, 53.8] |
| Diabetical comorbidity           | .    | .                                        | .            | .                                        | .            |
| No                               | 1613 | 68.21                                    | [65.6, 70.7] | 64.90                                    | [61.9, 67.8] |
| Yes                              | 275  | 58.54                                    | [51.9, 64.8] | 49.22                                    | [42.0, 56.4] |
| Cardiological comorbidity        | .    | .                                        | .            | .                                        | .            |
| No                               | 791  | 75.52                                    | [72.1, 78.6] | 73.39                                    | [69.6, 76.9] |
| Yes                              | 1097 | 60.12                                    | [56.8, 63.4] | 54.31                                    | [50.5, 58.1] |
| Prior malignancy                 | .    | .                                        | .            | .                                        | .            |
| No                               | 1770 | 67.46                                    | [65.0, 69.9] | 63.87                                    | [61.0, 66.6] |
| Yes                              | 118  | 56.82                                    | [46.5, 66.2] | 43.43                                    | [32.8, 54.2] |
| Subsequent malignancy            | .    | .                                        | .            | .                                        | .            |
| No                               | 1778 | 65.97                                    | [63.5, 68.4] | 63.05                                    | [60.2, 65.8] |
| Yes                              | 110  | 79.29                                    | [69.4, 87.0] | 54.69                                    | [43.3, 65.4] |
| Age category                     | .    | .                                        | .            | .                                        | .            |
| 20-59yr                          | 432  | 84.71                                    | [80.9, 87.9] | 79.97                                    | [75.7, 83.6] |
| 60-69yr                          | 393  | 75.68                                    | [70.9, 79.9] | 69.07                                    | [63.7, 74.0] |
| 70-79yr                          | 535  | 66.20                                    | [61.6, 70.5] | 62.72                                    | [57.4, 67.8] |
| 80-84yr                          | 289  | 47.58                                    | [40.9, 54.1] | 46.51                                    | [38.5, 54.8] |

| Characteristic                    | N   | 2-year relative survival after incidence |              | 5-year relative survival after incidence |              |
|-----------------------------------|-----|------------------------------------------|--------------|------------------------------------------|--------------|
|                                   |     | Estimate                                 | 95% CI       | Estimate                                 | 95% CI       |
| 85+yr                             | 239 | 35.10                                    | [27.9, 42.7] | 32.08                                    | [23.0, 42.7] |
| First-line treatment              | .   | .                                        | .            | .                                        | .            |
| Full R-CHOP                       | 826 | 89.20                                    | [86.4, 91.6] | 83.94                                    | [80.2, 87.3] |
| Other anthracycline               | 271 | 69.80                                    | [63.5, 75.4] | 66.36                                    | [59.3, 72.8] |
| Non anthracycline                 | 162 | 49.10                                    | [40.2, 57.7] | 42.79                                    | [32.9, 53.1] |
| No chemotherapy/radiotherapy      | 245 | 6.63                                     | [4.3, 9.6]   | 5.00                                     | [3.0, 7.8]   |
| Incomplete R-CHOP                 | 337 | 57.21                                    | [51.3, 62.7] | 54.94                                    | [48.5, 61.2] |
| Radiotherapy only $\leq$ 12 weeks | 47  | 52.63                                    | [34.9, 69.5] | 53.05                                    | [31.0, 77.3] |



**Supplementary Table 3: Distribution of administered first-line regimens, with or without the use of rituximab. n(%)**

| <b>First-line regimen</b>       | <b>With rituximab</b> | <b>Without rituximab</b> |
|---------------------------------|-----------------------|--------------------------|
| <b>Overall</b>                  | <b>1,527 (100)</b>    | <b>69 (100)</b>          |
| CHOP                            | 1145 (75)             | 17 (25)                  |
| CHOP-like  Other                | 82 (5)                | 4 (6)                    |
| CVP                             | 72 (5)                | 3 (4)                    |
| ACVBP                           | 47 (3)                | 12 (17)                  |
| CODOX-M/HyperCVAD               | 43 (3)                | 1 (1)                    |
| CHOEP                           | 42 (3)                | 1 (1)                    |
| COEP                            | 26 (2)                | 0 (0)                    |
| Non-anthracycline  Other        | 22 (1)                | 0 (0)                    |
| rituximab monotherapy           | 20 (1)                | 0 (0)                    |
| COP                             | 18 (1)                | 0 (0)                    |
| R-MAD                           | 2 (0)                 | 4 (6)                    |
| only Platinum-containing  Other | 2 (0)                 | 2 (3)                    |
| DHAP                            | 2 (0)                 | 0 (0)                    |
| Palliative                      | 1 (0)                 | 22 (32)                  |
| 2nd line-other  Other           | 1 (0)                 | 0 (0)                    |
| DHAOX                           | 1 (0)                 | 0 (0)                    |
| ICE                             | 1 (0)                 | 0 (0)                    |
| Bendamustine-containing         | 0 (0)                 | 1 (1)                    |
| CNS-directed  Other             | 0 (0)                 | 1 (1)                    |
| Other – Experimental  Other     | 0 (0)                 | 1 (1)                    |

**Supplementary Table 4: Patient characteristics of the incomplete R-CHOP subgroups compared to full R-CHOP.** Incomplete R-CHOP is defined as <6 cycles (or <4 if Ann Arbor stage=1). Refractory patients were defined as starting any second-line regimen <12 weeks from the end of the last R-CHOP cycle. *PS=Performance status; GCB=Germinal Center B-cell; IHC=immunohistochemistry; RT=radiotherapy*

|                 | incomplete R-CHOP 4-5 cycles – no RT<12 weeks from end of last R-CHOP | incomplete R-CHOP 4-5 cycles – RT <12 weeks from end of last R-CHOP | incomplete R-CHOP <4 cycles – no RT<12 weeks from end of last R-CHOP | incomplete R-CHOP <4 cycles – RT <12 weeks from end of last R-CHOP | incomplete R-CHOP + refractory | Full R-CHOP |
|-----------------|-----------------------------------------------------------------------|---------------------------------------------------------------------|----------------------------------------------------------------------|--------------------------------------------------------------------|--------------------------------|-------------|
| Overall         | 112                                                                   | 30                                                                  | 156                                                                  | 39                                                                 | 40                             | 826         |
| Gender          |                                                                       |                                                                     |                                                                      |                                                                    |                                |             |
| Male            | 58 (52)                                                               | 17 (57)                                                             | 88 (56)                                                              | 24 (62)                                                            | 22 (55)                        | 466 (56)    |
| Female          | 54 (48)                                                               | 13 (43)                                                             | 68 (44)                                                              | 15 (38)                                                            | 18 (45)                        | 360 (44)    |
| PS              |                                                                       |                                                                     |                                                                      |                                                                    |                                |             |
| 0               | 22 (20)                                                               | 6 (20)                                                              | 12 (8)                                                               | 9 (23)                                                             | 2 (5)                          | 130 (16)    |
| 1               | 57 (51)                                                               | 19 (63)                                                             | 87 (56)                                                              | 23 (59)                                                            | 27 (68)                        | 527 (64)    |
| 2               | 11 (10)                                                               | 2 (7)                                                               | 20 (13)                                                              | 4 (10)                                                             | 4 (10)                         | 63 (8)      |
| 3               | 5 (4)                                                                 | 0 (0)                                                               | 5 (3)                                                                | 0 (0)                                                              | 1 (3)                          | 22 (3)      |
| 4               | 4 (4)                                                                 | 0 (0)                                                               | 5 (3)                                                                | 0 (0)                                                              | 1 (3)                          | 4 (0)       |
| Not available   | 13 (12)                                                               | 3 (10)                                                              | 27 (17)                                                              | 3 (8)                                                              | 5 (13)                         | 80 (10)     |
| Ann Arbor stage |                                                                       |                                                                     |                                                                      |                                                                    |                                |             |
| 1               | 0 (0)                                                                 | 0 (0)                                                               | 8 (5)                                                                | 22 (56)                                                            | 1 (3)                          | 106 (13)    |
| 2               | 18 (16)                                                               | 9 (30)                                                              | 12 (8)                                                               | 4 (10)                                                             | 4 (10)                         | 135 (16)    |
| 3               | 19 (17)                                                               | 0 (0)                                                               | 17 (11)                                                              | 1 (3)                                                              | 5 (13)                         | 112 (14)    |
| 4               | 45 (40)                                                               | 7 (23)                                                              | 56 (36)                                                              | 2 (5)                                                              | 23 (58)                        | 259 (31)    |
| Not available   | 30 (27)                                                               | 14 (47)                                                             | 63 (40)                                                              | 10 (26)                                                            | 7 (18)                         | 214 (26)    |
| Cell of origin  |                                                                       |                                                                     |                                                                      |                                                                    |                                |             |
| GCB             | 40 (36)                                                               | 9 (30)                                                              | 47 (30)                                                              | 18 (46)                                                            | 14 (35)                        | 273 (33)    |
| Not available   | 37 (33)                                                               | 10 (33)                                                             | 51 (33)                                                              | 13 (33)                                                            | 13 (33)                        | 286 (35)    |
| non-GCB         | 35 (31)                                                               | 11 (37)                                                             | 58 (37)                                                              | 8 (21)                                                             | 13 (33)                        | 267 (32)    |

|                                         | <b>incomplete R-CHOP 4-5 cycles – no RT&lt;12 weeks from end of last R-CHOP</b> | <b>incomplete R-CHOP 4-5 cycles – RT &lt;12 weeks from end of last R-CHOP</b> | <b>incomplete R-CHOP &lt;4 cycles – no RT&lt;12 weeks from end of last R-CHOP</b> | <b>incomplete R-CHOP &lt;4 cycles – RT &lt;12 weeks from end of last R-CHOP</b> | <b>incomplete R-CHOP + refractory</b> | <b>Full R-CHOP</b> |
|-----------------------------------------|---------------------------------------------------------------------------------|-------------------------------------------------------------------------------|-----------------------------------------------------------------------------------|---------------------------------------------------------------------------------|---------------------------------------|--------------------|
| <b>Ki67</b>                             |                                                                                 |                                                                               |                                                                                   |                                                                                 |                                       |                    |
| <50                                     | 3 (3)                                                                           | 0 (0)                                                                         | 5 (3)                                                                             | 1 (3)                                                                           | 2 (5)                                 | 25 (3)             |
| >=50                                    | 56 (50)                                                                         | 20 (67)                                                                       | 98 (63)                                                                           | 19 (49)                                                                         | 25 (63)                               | 455 (55)           |
| Not available                           | 53 (47)                                                                         | 10 (33)                                                                       | 53 (34)                                                                           | 19 (49)                                                                         | 13 (33)                               | 346 (42)           |
| <b>BCL2 IHC overexpression</b>          |                                                                                 |                                                                               |                                                                                   |                                                                                 |                                       |                    |
| No                                      | 15 (13)                                                                         | 1 (3)                                                                         | 15 (10)                                                                           | 4 (10)                                                                          | 3 (8)                                 | 112 (14)           |
| Not available                           | 49 (44)                                                                         | 11 (37)                                                                       | 44 (28)                                                                           | 21 (54)                                                                         | 11 (28)                               | 294 (36)           |
| Yes                                     | 48 (43)                                                                         | 18 (60)                                                                       | 97 (62)                                                                           | 14 (36)                                                                         | 26 (65)                               | 420 (51)           |
| <b>Language of the pathology report</b> |                                                                                 |                                                                               |                                                                                   |                                                                                 |                                       |                    |
| French                                  | 43 (38)                                                                         | 7 (23)                                                                        | 61 (39)                                                                           | 9 (23)                                                                          | 16 (40)                               | 265 (32)           |
| Dutch                                   | 69 (62)                                                                         | 23 (77)                                                                       | 95 (61)                                                                           | 30 (77)                                                                         | 24 (60)                               | 561 (68)           |
| <b>Respiratorical comorbidity</b>       |                                                                                 |                                                                               |                                                                                   |                                                                                 |                                       |                    |
| No                                      | 100 (89)                                                                        | 28 (93)                                                                       | 144 (92)                                                                          | 34 (87)                                                                         | 38 (95)                               | 772 (93)           |
| Yes                                     | 12 (11)                                                                         | 2 (7)                                                                         | 12 (8)                                                                            | 5 (13)                                                                          | 2 (5)                                 | 54 (7)             |
| <b>Diabetical comorbidity</b>           |                                                                                 |                                                                               |                                                                                   |                                                                                 |                                       |                    |
| No                                      | 94 (84)                                                                         | 25 (83)                                                                       | 130 (83)                                                                          | 32 (82)                                                                         | 36 (90)                               | 718 (87)           |
| Yes                                     | 18 (16)                                                                         | 5 (17)                                                                        | 26 (17)                                                                           | 7 (18)                                                                          | 4 (10)                                | 108 (13)           |
| <b>Cardiological comorbidity</b>        |                                                                                 |                                                                               |                                                                                   |                                                                                 |                                       |                    |
| No                                      | 41 (37)                                                                         | 14 (47)                                                                       | 71 (46)                                                                           | 13 (33)                                                                         | 26 (65)                               | 400 (48)           |
| Yes                                     | 71 (63)                                                                         | 16 (53)                                                                       | 85 (54)                                                                           | 26 (67)                                                                         | 14 (35)                               | 426 (52)           |
| <b>Prior malignancy</b>                 |                                                                                 |                                                                               |                                                                                   |                                                                                 |                                       |                    |
| No                                      | 107 (96)                                                                        | 27 (90)                                                                       | 145 (93)                                                                          | 34 (87)                                                                         | 36 (90)                               | 783 (95)           |
| Yes                                     | 5 (4)                                                                           | 3 (10)                                                                        | 11 (7)                                                                            | 5 (13)                                                                          | 4 (10)                                | 43 (5)             |

|                              | <b>incomplete R-CHOP 4-5 cycles – no RT&lt;12 weeks from end of last R-CHOP</b> | <b>incomplete R-CHOP 4-5 cycles – RT &lt;12 weeks from end of last R-CHOP</b> | <b>incomplete R-CHOP &lt;4 cycles – no RT&lt;12 weeks from end of last R-CHOP</b> | <b>incomplete R-CHOP &lt;4 cycles – RT &lt;12 weeks from end of last R-CHOP</b> | <b>incomplete R-CHOP + refractory</b> | <b>Full R-CHOP</b> |
|------------------------------|---------------------------------------------------------------------------------|-------------------------------------------------------------------------------|-----------------------------------------------------------------------------------|---------------------------------------------------------------------------------|---------------------------------------|--------------------|
| <b>Subsequent malignancy</b> |                                                                                 |                                                                               |                                                                                   |                                                                                 |                                       |                    |
| No                           | 106 (95)                                                                        | 29 (97)                                                                       | 151 (97)                                                                          | 36 (92)                                                                         | 38 (95)                               | 765 (93)           |
| Yes                          | 6 (5)                                                                           | 1 (3)                                                                         | 5 (3)                                                                             | 3 (8)                                                                           | 2 (5)                                 | 61 (7)             |
| <b>Age category</b>          |                                                                                 |                                                                               |                                                                                   |                                                                                 |                                       |                    |
| 20-59yr                      | 28 (25)                                                                         | 7 (23)                                                                        | 36 (23)                                                                           | 7 (18)                                                                          | 15 (38)                               | 210 (25)           |
| 60-69yr                      | 23 (21)                                                                         | 7 (23)                                                                        | 36 (23)                                                                           | 4 (10)                                                                          | 14 (35)                               | 238 (29)           |
| 70-79yr                      | 36 (32)                                                                         | 10 (33)                                                                       | 45 (29)                                                                           | 19 (49)                                                                         | 8 (20)                                | 261 (32)           |
| 80-84yr                      | 18 (16)                                                                         | 5 (17)                                                                        | 32 (21)                                                                           | 7 (18)                                                                          | 3 (8)                                 | 90 (11)            |
| 85+yr                        | 7 (6)                                                                           | 1 (3)                                                                         | 7 (4)                                                                             | 2 (5)                                                                           | 0 (0)                                 | 27 (3)             |

**Supplementary Table 5: Patient characteristics grouped by first-line treatments.**

*PS=Performance status; GCB=Germinal Center B-cell; IHC=immunohistochemistry.*

|                                | Full R-CHOP | Other anthracycline | Non-anthracycline | Incomplete R-CHOP | Only RT | No chemo radiotherapy | Overall    |
|--------------------------------|-------------|---------------------|-------------------|-------------------|---------|-----------------------|------------|
| Overall                        | 826         | 271                 | 162               | 337               | 47      | 245                   | 1,888      |
| <b>Gender</b>                  |             |                     |                   |                   |         |                       |            |
| Male                           | 466 (56)    | 156 (58)            | 74 (46)           | 187 (55)          | 23 (49) | 124 (51)              | 1,030 (55) |
| Female                         | 360 (44)    | 115 (42)            | 88 (54)           | 150 (45)          | 24 (51) | 121 (49)              | 858 (45)   |
| <b>PS</b>                      |             |                     |                   |                   |         |                       |            |
| 0                              | 130 (16)    | 40 (15)             | 14 (9)            | 49 (15)           | 6 (13)  | 10 (4)                | 249 (13)   |
| 1                              | 527 (64)    | 158 (58)            | 87 (54)           | 186 (55)          | 29 (62) | 73 (30)               | 1,060 (56) |
| 2                              | 63 (8)      | 27 (10)             | 16 (10)           | 37 (11)           | 3 (6)   | 30 (12)               | 176 (9)    |
| 3                              | 22 (3)      | 13 (5)              | 13 (8)            | 10 (3)            | 2 (4)   | 25 (10)               | 85 (5)     |
| 4                              | 4 (0)       | 4 (1)               | 3 (2)             | 9 (3)             | 0 (0)   | 15 (6)                | 35 (2)     |
| Not available                  | 80 (10)     | 29 (11)             | 29 (18)           | 46 (14)           | 7 (15)  | 92 (38)               | 283 (15)   |
| <b>Ann Arbor stage</b>         |             |                     |                   |                   |         |                       |            |
| 1                              | 106 (13)    | 31 (11)             | 13 (8)            | 30 (9)            | 20 (43) | 16 (7)                | 216 (11)   |
| 2                              | 135 (16)    | 33 (12)             | 28 (17)           | 43 (13)           | 5 (11)  | 8 (3)                 | 252 (13)   |
| 3                              | 112 (14)    | 38 (14)             | 22 (14)           | 37 (11)           | 0 (0)   | 11 (4)                | 220 (12)   |
| 4                              | 259 (31)    | 95 (35)             | 48 (30)           | 110 (33)          | 5 (11)  | 48 (20)               | 565 (30)   |
| Not available                  | 214 (26)    | 74 (27)             | 51 (31)           | 117 (35)          | 17 (36) | 162 (66)              | 635 (34)   |
| <b>Cell of origin</b>          |             |                     |                   |                   |         |                       |            |
| GCB                            | 273 (33)    | 96 (35)             | 49 (30)           | 114 (34)          | 13 (28) | 60 (24)               | 605 (32)   |
| NA                             | 286 (35)    | 91 (34)             | 64 (39.51)        | 111 (33)          | 24 (51) | 120 (49)              | 696 (37)   |
| non-GCB                        | 267 (32)    | 84 (31)             | 49 (30)           | 112 (33)          | 10 (21) | 65 (27)               | 587 (31)   |
| <b>Ki-67 expression on IHC</b> |             |                     |                   |                   |         |                       |            |
| <50%                           | 25 (3)      | 7 (3)               | 6 (4)             | 9 (3)             | 1 (2)   | 5 (2)                 | 53 (3)     |
| ≥50%                           | 455 (55)    | 163 (60)            | 83 (51)           | 193 (57)          | 27 (57) | 123 (50)              | 1,044 (55) |
| Not available                  | 346 (42)    | 101 (37)            | 73 (45)           | 135 (40)          | 19 (40) | 117 (48)              | 791 (42)   |

|                                         | Full R-CHOP | Other anthracycline | Non-anthracycline | Incomplete R-CHOP | Only RT | No chemo radiotherapy | Overall    |
|-----------------------------------------|-------------|---------------------|-------------------|-------------------|---------|-----------------------|------------|
| <b>BCL2 overexpression on IHC</b>       |             |                     |                   |                   |         |                       |            |
| No                                      | 112 (14)    | 44 (16)             | 23 (14)           | 35 (10)           | 4 (9)   | 35 (14)               | 253 (13)   |
| Not available                           | 294 (36)    | 87 (32)             | 64 (39.51)        | 125 (37)          | 23 (49) | 117 (48)              | 710 (38)   |
| Yes                                     | 420 (51)    | 140 (52)            | 75 (46)           | 177 (53)          | 20 (43) | 93 (38)               | 925 (49)   |
| <b>Language of the pathology report</b> |             |                     |                   |                   |         |                       |            |
| French                                  | 265 (32)    | 121 (45)            | 56 (35)           | 120 (36)          | 11 (23) | 86 (35)               | 659 (35)   |
| Dutch                                   | 561 (68)    | 150 (55)            | 106 (65)          | 217 (64)          | 36 (77) | 159 (65)              | 1,229 (65) |
| <b>Respiratorical comorbidity</b>       |             |                     |                   |                   |         |                       |            |
| No                                      | 772 (93)    | 244 (90)            | 143 (88)          | 306 (91)          | 42 (89) | 213 (87)              | 1,720 (91) |
| Yes                                     | 54 (7)      | 27 (10)             | 19 (12)           | 31 (9)            | 5 (11)  | 32 (13)               | 168 (9)    |
| <b>Diabetical comorbidity</b>           |             |                     |                   |                   |         |                       |            |
| No                                      | 718 (87)    | 236 (87)            | 131 (81)          | 281 (83)          | 39 (83) | 208 (85)              | 1,613 (85) |
| Yes                                     | 108 (13)    | 35 (13)             | 31 (19)           | 56 (17)           | 8 (17)  | 37 (15)               | 275 (15)   |
| <b>Cardiological comorbidity</b>        |             |                     |                   |                   |         |                       |            |
| No                                      | 400 (48)    | 146 (54)            | 31 (19)           | 139 (41)          | 8 (17)  | 67 (27)               | 791 (42)   |
| Yes                                     | 426 (52)    | 125 (46)            | 131 (81)          | 198 (59)          | 39 (83) | 178 (73)              | 1,097 (58) |
| <b>Prior malignancy</b>                 |             |                     |                   |                   |         |                       |            |
| No                                      | 783 (95)    | 252 (93)            | 151 (93)          | 313 (93)          | 41 (87) | 230 (94)              | 1,770 (94) |
| Yes                                     | 43 (5)      | 19 (7)              | 11 (7)            | 24 (7)            | 6 (13)  | 15 (6)                | 118 (6)    |
| <b>Subsequent malignancy</b>            |             |                     |                   |                   |         |                       |            |
| No                                      | 765 (93)    | 255 (94)            | 155 (96)          | 322 (96)          | 43 (91) | 238 (97)              | 1,778 (94) |
| Yes                                     | 61 (7)      | 16 (6)              | 7 (4)             | 15 (4)            | 4 (9)   | 7 (3)                 | 110 (6)    |

|                     | <b>Full R-<br/>CHOP</b> | <b>Other<br/>anthracycline</b> | <b>Non-<br/>anthracycline</b> | <b>Incomplete<br/>R-CHOP</b> | <b>Only<br/>RT</b> | <b>No chemo<br/>radiotherapy</b> | <b>Overall</b> |
|---------------------|-------------------------|--------------------------------|-------------------------------|------------------------------|--------------------|----------------------------------|----------------|
| <i>Age category</i> |                         |                                |                               |                              |                    |                                  |                |
| 20-59yr             | 210 (25)                | 115 (42)                       | 8 (5)                         | 78 (23)                      | 2 (4)              | 19 (8)                           | 432 (23)       |
| 60-69yr             | 238 (29)                | 45 (17)                        | 16 (10)                       | 70 (21)                      | 3 (6)              | 21 (9)                           | 393 (21)       |
| 70-79yr             | 261 (32)                | 68 (25)                        | 39 (24)                       | 110 (33)                     | 6 (13)             | 51 (21)                          | 535 (28)       |
| 80-84yr             | 90 (11)                 | 30 (11)                        | 46 (28)                       | 62 (18)                      | 12 (26)            | 49 (20)                          | 289 (15)       |
| 85+yr               | 27 (3)                  | 13 (5)                         | 53 (33)                       | 17 (5)                       | 24 (51)            | 105 (43)                         | 239 (13)       |

**Supplementary Table 6: Patient characteristics according to CNS Prophylaxis in R-CHOP(-like) treated patients, divided by mode of administration.** *CNS=Central Nervous System; IT=intrathecal; IV=intravenous; MTX=methotrexate; PS=performance status. N(%)*

|                        | MTX-IT ( $\leq 4$ cycles) | HD MTX (1 or 2 cycles) | No CNS prophylaxis | Total    |
|------------------------|---------------------------|------------------------|--------------------|----------|
| Overall                | 176 (14)                  | 53 (4)                 | 999 (81)           | 1,228    |
| <b>Age</b>             |                           |                        |                    |          |
| 20-59yr                | 57 (19)                   | 20 (7)                 | 224 (74)           | 301 (25) |
| 60-69yr                | 67 (21)                   | 17 (5)                 | 231 (73)           | 315 (26) |
| 70-79yr                | 33 (8)                    | 15 (4)                 | 345 (88)           | 393 (32) |
| 80-84yr                | 16 (10)                   | 1 (1)                  | 149 (90)           | 166 (14) |
| 85yr+                  | 3 (6)                     | 0 (0)                  | 50 (94)            | 53 (4)   |
| <b>Sex</b>             |                           |                        |                    |          |
| Males                  | 98 (14)                   | 36 (5)                 | 557 (81)           | 691 (56) |
| Females                | 78 (15)                   | 17 (3)                 | 442 (82)           | 537 (44) |
| <b>PS</b>              |                           |                        |                    |          |
| 0-1                    | 144 (16)                  | 33 (4)                 | 755 (81)           | 932 (76) |
| 2-3-4                  | 23 (15)                   | 14 (9)                 | 120 (76)           | 157 (13) |
| Not available          | 9 (7)                     | 6 (4)                  | 124 (89)           | 139 (11) |
| <b>Ann Arbor stage</b> |                           |                        |                    |          |
| 1-2                    | 34 (10)                   | 10 (3)                 | 289 (87)           | 333 (27) |
| 3                      | 19 (11)                   | 5 (3)                  | 143 (86)           | 167 (14) |
| 4                      | 79 (21)                   | 26 (7)                 | 277 (73)           | 382 (31) |
| Not available          | 44 (13)                   | 12 (4)                 | 290 (84)           | 346 (28) |



**Supplementary Table 7: All second-line treatments by age group (n (% of age group)).**

|                                | 20-39yr | 40-59yr | 60-64yr | 65-69yr | 70-74yr | 75-79yr | 80-84yr | 85-89yr |
|--------------------------------|---------|---------|---------|---------|---------|---------|---------|---------|
| <b>Overall</b>                 | 12      | 72      | 34      | 37      | 39      | 32      | 24      | 4       |
| <b>Second-line regimen</b>     |         |         |         |         |         |         |         |         |
| 2nd line-other Other           | 0 (0)   | 0 (0)   | 0 (0)   | 1 (3)   | 3 (8)   | 1 (3)   | 1 (4)   | 1 (25)  |
| BVAM                           | 0 (0)   | 0 (0)   | 0 (0)   | 0 (0)   | 0 (0)   | 1 (3)   | 0 (0)   | 0 (0)   |
| Bendamustine-containing        | 0 (0)   | 0 (0)   | 0 (0)   | 0 (0)   | 0 (0)   | 1 (3)   | 5 (21)  | 2 (50)  |
| CHOP                           | 0 (0)   | 0 (0)   | 0 (0)   | 0 (0)   | 0 (0)   | 1 (3)   | 1 (4)   | 0 (0)   |
| CHOP-like Other                | 0 (0)   | 0 (0)   | 0 (0)   | 0 (0)   | 0 (0)   | 1 (3)   | 0 (0)   | 0 (0)   |
| CNS-directed Other             | 0 (0)   | 1 (1)   | 0 (0)   | 0 (0)   | 0 (0)   | 1 (3)   | 0 (0)   | 0 (0)   |
| CVP                            | 0 (0)   | 1 (1)   | 0 (0)   | 0 (0)   | 0 (0)   | 1 (3)   | 0 (0)   | 0 (0)   |
| DHAOX                          | 1 (8)   | 5 (7)   | 4 (12)  | 6 (16)  | 2 (5)   | 2 (6)   | 2 (8)   | 0 (0)   |
| DHAP                           | 8 (67)  | 38 (53) | 15 (44) | 15 (41) | 9 (23)  | 2 (6)   | 0 (0)   | 0 (0)   |
| DHAP-like                      | 0 (0)   | 1 (1)   | 4 (12)  | 0 (0)   | 3 (8)   | 4 (13)  | 0 (0)   | 0 (0)   |
| GDP                            | 0 (0)   | 0 (0)   | 0 (0)   | 0 (0)   | 1 (3)   | 0 (0)   | 0 (0)   | 0 (0)   |
| GemOx                          | 0 (0)   | 0 (0)   | 0 (0)   | 0 (0)   | 1 (3)   | 1 (3)   | 1 (4)   | 0 (0)   |
| HD MTX                         | 0 (0)   | 1 (1)   | 1 (3)   | 1 (3)   | 1 (3)   | 0 (0)   | 1 (4)   | 0 (0)   |
| ICE                            | 2 (17)  | 8 (11)  | 3 (9)   | 3 (8)   | 2 (5)   | 1 (3)   | 1 (4)   | 0 (0)   |
| MINE                           | 0 (0)   | 0 (0)   | 0 (0)   | 0 (0)   | 0 (0)   | 1 (3)   | 0 (0)   | 0 (0)   |
| Non-Anthracycline  Other       | 0 (0)   | 0 (0)   | 0 (0)   | 1 (3)   | 0 (0)   | 0 (0)   | 0 (0)   | 0 (0)   |
| Other - Experimental Other     | 0 (0)   | 2 (3)   | 2 (6)   | 0 (0)   | 0 (0)   | 0 (0)   | 1 (4)   | 0 (0)   |
| Palliative                     | 0 (0)   | 1 (1)   | 0 (0)   | 4 (11)  | 6 (15)  | 5 (16)  | 3 (13)  | 0 (0)   |
| R-MAD                          | 0 (0)   | 8 (11)  | 2 (6)   | 0 (0)   | 2 (5)   | 1 (3)   | 0 (0)   | 0 (0)   |
| only Cytarabine-containing     | 1 (8)   | 3 (4)   | 0 (0)   | 3 (8)   | 0 (0)   | 0 (0)   | 0 (0)   | 0 (0)   |
| only Platinum-containing Other | 0 (0)   | 3 (4)   | 3 (9)   | 3 (8)   | 9 (23)  | 8 (25)  | 8 (33)  | 1 (25)  |

**Supplementary Table 8: Univariable analysis based on Cox models** including all evaluated variables in all patients receiving any first line treatment. *CI=Confidence Interval; PS=Performance status; GCB=Germinal Center B-cell; IHC=immunohistochemistry*

| Unadjusted hazard ratio                                     |                       |          |                       |         |                          |
|-------------------------------------------------------------|-----------------------|----------|-----------------------|---------|--------------------------|
|                                                             | Lower limit of 95% CI | Estimate | Upper limit of 95% CI | P value | P value from type 3 test |
| Language of the pathology report                            | .                     | .        | .                     | .       | 0.5997                   |
| French (ref: Dutch)                                         | 0.91                  | 1.04     | 1.18                  | 0.5997  | .                        |
| Age                                                         | .                     | .        | .                     | .       | <.0001                   |
| Age (expressed in year)                                     | 1.05                  | 1.06     | 1.07                  | <.0001  | .                        |
| BCL2 overexpression on IHC [ $\leq 1$ year after incidence] | .                     | .        | .                     | .       | 0.0080                   |
| Not available (ref: Yes) [ $\leq 1$ year after incidence]   | 1.10                  | 1.46     | 1.94                  | 0.0093  | .                        |
| Yes (ref: No) [ $\leq 1$ year after incidence]              | 0.88                  | 1.17     | 1.54                  | 0.2852  | .                        |
| BCL2 overexpression on IHC [ $> 1$ year after incidence]    | .                     | .        | .                     | .       | 0.0020                   |
| Not available (ref: Yes) [ $> 1$ year after incidence]      | 1.23                  | 1.73     | 2.43                  | 0.0018  | .                        |
| Yes (ref: No) [ $> 1$ year after incidence]                 | 1.30                  | 1.81     | 2.52                  | 0.0004  | .                        |
| Cell of origin [ $\leq 1$ year after incidence]             | .                     | .        | .                     | .       | 0.0002                   |
| Not available (ref: GCB) [ $\leq 1$ year after incidence]   | 1.25                  | 1.53     | 1.88                  | <.0001  | .                        |
| non-GCB (ref: GCB) [ $\leq 1$ year after incidence]         | 0.99                  | 1.23     | 1.54                  | 0.0672  | .                        |
| Cell of origin [ $> 1$ year after incidence]                | .                     | .        | .                     | .       | 0.0026                   |
| Not available (ref: GCB) [ $> 1$ year after incidence]      | 1.00                  | 1.26     | 1.60                  | 0.0523  | .                        |
| non-GCB (ref: GCB) [ $> 1$ year after incidence]            | 1.19                  | 1.51     | 1.91                  | 0.0006  | .                        |

| Unadjusted hazard ratio                                 |                                                           |                                   |          |                                   |            |                                      |
|---------------------------------------------------------|-----------------------------------------------------------|-----------------------------------|----------|-----------------------------------|------------|--------------------------------------|
|                                                         |                                                           | Lower<br>limit<br>of<br>95%<br>CI | Estimate | Upper<br>limit<br>of<br>95%<br>CI | P<br>value | P<br>value<br>from<br>type 3<br>test |
| Ki-67 expression on IHC<br>[≤0.25 year after incidence] |                                                           |                                   |          |                                   |            | 0.0338                               |
|                                                         | Not available (ref: <50%)<br>[≤0.25 year after incidence] | 0.48                              | 0.91     | 1.73                              | 0.7765     | .                                    |
|                                                         | ≥50% (ref: <50%)<br>[≤0.25 year after incidence]          | 0.36                              | 0.68     | 1.28                              | 0.2303     | .                                    |
| Ki-67 expression on IHC<br>[>0.25 year after incidence] |                                                           |                                   |          |                                   |            | 0.2168                               |
|                                                         | Not available (ref: <50%)<br>[>0.25 year after incidence] | 0.78                              | 1.28     | 2.11                              | 0.3335     | .                                    |
|                                                         | ≥50% (ref: <50%)<br>[>0.25 year after incidence]          | 0.86                              | 1.42     | 2.34                              | 0.1749     | .                                    |
| Gender                                                  |                                                           |                                   |          |                                   |            | 0.3935                               |
|                                                         | Male (ref: Female)                                        | 0.93                              | 1.06     | 1.20                              | 0.3935     | .                                    |
| PS [≤0.25 year after incidence]                         |                                                           |                                   |          |                                   |            | <.0001                               |
|                                                         | 2-3-4 (ref: 0-1)<br>[≤0.25 year after incidence]          | 4.04                              | 5.36     | 7.11                              | <.0001     | .                                    |
|                                                         | Not available (ref: 0-1)<br>[≤0.25 year after incidence]  | 4.21                              | 5.60     | 7.46                              | <.0001     | .                                    |
| PS [>0.25 year after incidence]                         |                                                           |                                   |          |                                   |            | <.0001                               |
|                                                         | 2-3-4 (ref: 0-1)<br>[>0.25 year after incidence]          | 1.55                              | 1.90     | 2.32                              | <.0001     | .                                    |
|                                                         | Not available (ref: 0-1)<br>[>0.25 year after incidence]  | 1.00                              | 1.25     | 1.56                              | 0.0544     | .                                    |
| Ann Arbor stage<br>[≤0.25 year after incidence]         |                                                           |                                   |          |                                   |            | <.0001                               |
|                                                         | 3 (ref: 1-2)<br>[≤0.25 year after incidence]              | 0.56                              | 1.03     | 1.91                              | 0.9259     | .                                    |
|                                                         | 4 (ref: 1-2)<br>[≤0.25 year after incidence]              | 1.60                              | 2.41     | 3.63                              | <.0001     | .                                    |
|                                                         | Not available (ref: 1-2)<br>[≤0.25 year after incidence]  | 2.81                              | 4.13     | 6.07                              | <.0001     | .                                    |

| Unadjusted hazard ratio                         |                                                          |                                   |          |                                   |            |                                      |
|-------------------------------------------------|----------------------------------------------------------|-----------------------------------|----------|-----------------------------------|------------|--------------------------------------|
|                                                 |                                                          | Lower<br>limit<br>of<br>95%<br>CI | Estimate | Upper<br>limit<br>of<br>95%<br>CI | P<br>value | P<br>value<br>from<br>type 3<br>test |
| Ann Arbor stage<br>[>0.25 year after incidence] |                                                          | .                                 | .        | .                                 | .          | <.0001                               |
|                                                 | 3 (ref: 1-2)<br>[>0.25 year after incidence]             | 1.15                              | 1.50     | 1.94                              | 0.0026     | .                                    |
|                                                 | 4 (ref: 1-2)<br>[>0.25 year after incidence]             | 1.43                              | 1.76     | 2.16                              | <.0001     | .                                    |
|                                                 | Not available (ref: 1-2)<br>[>0.25 year after incidence] | 1.31                              | 1.61     | 1.99                              | <.0001     | .                                    |
| Diabetical comorbidity                          |                                                          | .                                 | .        | .                                 | .          | <.0001                               |
|                                                 | Yes (ref: No)                                            | 1.32                              | 1.55     | 1.81                              | <.0001     | .                                    |
| Cardiological comorbidity                       |                                                          | .                                 | .        | .                                 | .          | <.0001                               |
|                                                 | Yes (ref: No)                                            | 1.83                              | 2.10     | 2.40                              | <.0001     | .                                    |
| Respiratorical comorbidity                      |                                                          | .                                 | .        | .                                 | .          | <.0001                               |
|                                                 | Yes (ref: No)                                            | 1.23                              | 1.50     | 1.83                              | <.0001     | .                                    |
| Prior malignancy                                |                                                          | .                                 | .        | .                                 | .          | <.0001                               |
|                                                 | Yes (ref: No)                                            | 1.29                              | 1.61     | 2.02                              | <.0001     | .                                    |
| Subsequent malignancy                           |                                                          | .                                 | .        | .                                 | .          | <.0001                               |
|                                                 | Yes (ref: No)                                            | 2.02                              | 2.58     | 3.30                              | <.0001     | .                                    |
| Full R-CHOP                                     |                                                          | .                                 | .        | .                                 | .          | <.0001                               |
|                                                 | Yes (ref: No)                                            | 0.33                              | 0.38     | 0.44                              | <.0001     | .                                    |
| Other anthracycline chemotherapy                |                                                          | .                                 | .        | .                                 | .          | 0.3287                               |
|                                                 | Yes (ref: No)                                            | 0.75                              | 0.91     | 1.10                              | 0.3287     | .                                    |
| Non-anthracycline chemotherapy                  |                                                          | .                                 | .        | .                                 | .          | <.0001                               |
|                                                 | Yes (ref: No)                                            | 2.12                              | 2.56     | 3.08                              | <.0001     | .                                    |
| incomplete R-CHOP                               |                                                          | .                                 | .        | .                                 | .          | <.0001                               |
|                                                 | Yes (ref: No)                                            | 1.28                              | 1.50     | 1.75                              | <.0001     | .                                    |
| Only radiotherapy                               |                                                          | .                                 | .        | .                                 | .          | <.0001                               |
|                                                 | Yes (ref: No)                                            | 1.79                              | 2.49     | 3.47                              | <.0001     | .                                    |

**Supplementary Table 9: Adjusted hazard ratios (HR) from a multivariable analysis based on Cox models** including all evaluated variables in all patients receiving any first line treatment.  
*CI=Confidence Interval; PS=Performance status; GCB=Germinal Center B-cell; IHC=immunohistochemistry*

| Adjusted hazard ratio                                |                       |          |                       |         |                          |
|------------------------------------------------------|-----------------------|----------|-----------------------|---------|--------------------------|
|                                                      | Lower limit of 95% CI | Estimate | Upper limit of 95% CI | P value | P value from type 3 test |
| Language of the pathology report                     | .                     | .        | .                     | .       | 0.0715                   |
| French (ref: Dutch)                                  | 0.99                  | 1.13     | 1.30                  | 0.0715  | .                        |
| Age                                                  | .                     | .        | .                     | .       | <.0001                   |
| 60-69 yr (ref: 20-59 yr)                             | 1.40                  | 1.81     | 2.35                  | <.0001  | .                        |
| 70-79 yr (ref: 20-59 yr)                             | 2.05                  | 2.62     | 3.33                  | <.0001  | .                        |
| 80-84 yr (ref: 20-59 yr)                             | 3.18                  | 4.13     | 5.35                  | <.0001  | .                        |
| 85+ yr (ref: 20-59 yr)                               | 4.53                  | 5.95     | 7.82                  | <.0001  | .                        |
| BCL2 overexpression on IHC [≤1 year after incidence] | .                     | .        | .                     | .       | 0.7114                   |
| Not available (ref: No) [≤1 year after incidence]    | 0.82                  | 1.10     | 1.48                  | 0.5260  | .                        |
| Yes (ref: No) [≤1 year after incidence]              | 0.77                  | 1.02     | 1.36                  | 0.8888  | .                        |
| BCL2 overexpression on IHC [>1 year after incidence] | .                     | .        | .                     | .       | 0.0556                   |
| Not available (ref: No) [>1 year after incidence]    | 1.00                  | 1.43     | 2.04                  | 0.0488  | .                        |
| Yes (ref: No) [>1 year after incidence]              | 1.08                  | 1.51     | 2.12                  | 0.0159  | .                        |
| Cell of origin [≤1 year after incidence]             | .                     | .        | .                     | .       | 0.1008                   |
| Not available (ref: GCB) [≤1 year after incidence]   | 1.02                  | 1.27     | 1.58                  | 0.0323  | .                        |
| non-GCB (ref: GCB) [≤1 year after incidence]         | 0.90                  | 1.13     | 1.42                  | 0.2862  | .                        |

| Adjusted hazard ratio                                   |                                                           |                                   |          |                                   |            |                                      |
|---------------------------------------------------------|-----------------------------------------------------------|-----------------------------------|----------|-----------------------------------|------------|--------------------------------------|
|                                                         |                                                           | Lower<br>limit<br>of<br>95%<br>CI | Estimate | Upper<br>limit<br>of<br>95%<br>CI | P<br>value | P<br>value<br>from<br>type 3<br>test |
| Cell of origin<br>[>1 year after incidence]             |                                                           | .                                 | .        | .                                 | .          | 0.0090                               |
|                                                         | Not available (ref: GCB)<br>[>1 year after incidence]     | 0.96                              | 1.23     | 1.58                              | 0.1027     | .                                    |
|                                                         | non-GCB (ref: GCB)<br>[>1 year after incidence]           | 1.14                              | 1.45     | 1.84                              | 0.0022     | .                                    |
| Ki-67 expression on IHC<br>[≤0.25 year after incidence] |                                                           | .                                 | .        | .                                 | .          | 0.4619                               |
|                                                         | Not available (ref: <50%)<br>[≤0.25 year after incidence] | 0.44                              | 0.84     | 1.60                              | 0.5915     | .                                    |
|                                                         | ≥50% (ref: <50%)<br>[≤0.25 year after incidence]          | 0.39                              | 0.74     | 1.41                              | 0.3575     | .                                    |
| Ki67 expression on IHC<br>[>0.25 year after incidence]  |                                                           | .                                 | .        | .                                 | .          | 0.6569                               |
|                                                         | Not available (ref: <50%)<br>[>0.25 year after incidence] | 0.72                              | 1.20     | 1.98                              | 0.4836     | .                                    |
|                                                         | ≥50% (ref: <50%)<br>[>0.25 year after incidence]          | 0.75                              | 1.25     | 2.08                              | 0.3927     | .                                    |
| Gender                                                  |                                                           | .                                 | .        | .                                 | .          | 0.0008                               |
|                                                         | Male (ref: Female)                                        | 1.10                              | 1.25     | 1.42                              | 0.0008     | .                                    |
| PS [≤0.25 year after incidence]                         |                                                           | .                                 | .        | .                                 | .          | <.0001                               |
|                                                         | 2-3-4 (ref: 0-1)<br>[≤0.25 year after incidence]          | 3.43                              | 4.56     | 6.06                              | <.0001     | .                                    |
|                                                         | NA (ref: 0-1)<br>[≤0.25 year after incidence]             | 3.32                              | 4.43     | 5.91                              | <.0001     | .                                    |
| PS [ >0.25 year after incidence]                        |                                                           | .                                 | .        | .                                 | .          | <.0001                               |
|                                                         | 2-3-4 (ref: 0-1)<br>[>0.25 year after incidence]          | 1.53                              | 1.88     | 2.30                              | <.0001     | .                                    |
|                                                         | Not available (ref: 0-1)<br>[>0.25 year after incidence]  | 0.82                              | 1.03     | 1.30                              | 0.7851     | .                                    |
| Diabetical comorbidity                                  |                                                           | .                                 | .        | .                                 | .          | 0.0119                               |

| Adjusted hazard ratio                      |               |                                   |          |                                   |            |                                      |
|--------------------------------------------|---------------|-----------------------------------|----------|-----------------------------------|------------|--------------------------------------|
|                                            |               | Lower<br>limit<br>of<br>95%<br>CI | Estimate | Upper<br>limit<br>of<br>95%<br>CI | P<br>value | P<br>value<br>from<br>type 3<br>test |
|                                            | Yes (ref: No) | 1.05                              | 1.24     | 1.46                              | 0.0119     | .                                    |
| Cardiological comorbidity                  |               | .                                 | .        | .                                 | .          | 0.4035                               |
|                                            | Yes (ref: No) | 0.92                              | 1.07     | 1.25                              | 0.4035     | .                                    |
| Respiratorical comorbidity                 |               | .                                 | .        | .                                 | .          | 0.0009                               |
|                                            | Yes (ref: No) | 1.15                              | 1.41     | 1.73                              | 0.0009     | .                                    |
| Prior malignancy                           |               | .                                 | .        | .                                 | .          | 0.0117                               |
|                                            | Yes (ref: No) | 1.07                              | 1.34     | 1.68                              | 0.0117     | .                                    |
| Subsequent malignancy                      |               | .                                 | .        | .                                 | .          | <.0001                               |
|                                            | Yes (ref: No) | 1.96                              | 2.50     | 3.20                              | <.0001     | .                                    |
| Full R-CHOP                                |               | .                                 | .        | .                                 | .          | <.0001                               |
|                                            | Yes (ref: No) | 0.33                              | 0.41     | 0.52                              | <.0001     | .                                    |
| Anthracycline-containing other than R-CHOP |               | .                                 | .        | .                                 | .          | 0.0143                               |
|                                            | Yes (ref: No) | 0.55                              | 0.72     | 0.94                              | 0.0143     | .                                    |
| Non anthraycline                           |               | .                                 | .        | .                                 | .          | 0.8138                               |
|                                            | Yes (ref: No) | 0.80                              | 1.03     | 1.33                              | 0.8138     | .                                    |
| Incomplete R-CHOP                          |               | .                                 | .        | .                                 | .          | 0.5924                               |
|                                            | Yes (ref: No) | 0.74                              | 0.94     | 1.19                              | 0.5924     | .                                    |
| Only radiotherapy                          |               | .                                 | .        | .                                 | .          | 0.6226                               |
|                                            | Yes (ref: No) | 0.62                              | 0.91     | 1.33                              | 0.6226     | .                                    |
